# Supplementary material for: Genomic Characterization of Fluoroquinolone-Resistant Thermophilic Campylobacter Strains Isolated from Layer Chicken Feces in Gangneung, South Korea by Whole-Genome Sequencing
Source: MDPI journal article supplement (doi:10.3390/genes12081131), 2021-07-25
Supplement: s1 [file s1]

# Supplementary Table S1: Virulence genes

## A. Virulence genes of *C. jejuni* strain

| No . | GENE      | % COVERA<br>GE | % IDENTI<br>TY | ACCESSIO<br>N | ROLE                                                                            |
|------|-----------|----------------|----------------|---------------|---------------------------------------------------------------------------------|
| 1    | pebA      | 100            | 99.23          | NP_282073     | Adhesion                                                                        |
| 2    | cadF      | 100            | 98.75          | NP_282616     | Adhesion                                                                        |
| 3    | jlpA      | 100            | 98.39          | NP_282133     | adhesin                                                                         |
| 4    | ciaB      | 100            | 99.13          | NP_282066     | Invasion                                                                        |
| 5    | ciaC      | 100            | 98.75          | YP_002344633  | Invasion                                                                        |
| 6    | flaC      | 100            | 99.87          | NP_281892     | Invasion                                                                        |
| 7    | flaD      | 100            | 96.94          | NP_282040     | Flagella biosynthesis                                                           |
| 8    | flhA      | 100            | 99.86          | NP_282036     | Flagella biosynthesis, flagellar type III secretion system (T3SS)               |
| 9    | fliP      | 100            | 99.18          | NP_281981     | Flagella biosynthesis, flagellar type III secretion system (T3SS)               |
| 10   | fliR      | 100            | 98.83          | NP_282326     | Flagella biosynthesis, flagellar type III secretion system (T3SS)               |
| 11   | flgS      | 100            | 99.71          | YP_002344200  | flgSR two-component system (TCS) for flagellar gene expression                  |
| 12   | flgR      | 100            | 99             | NP_282174     | flgSR two-component system (TCS) flagellar gene expression                      |
| 13   | flgA      | 100            | 99.7           | YP_002344176  | Flagella biosynthesis, motility, and involved in biofilm formation              |
| 14   | flaA      | 99.77          | 92.91          | NP_282485     | Flagellin gene                                                                  |
| 15   | flaB      | 99.77          | 93.6           | NP_282484     | Flagellin gene                                                                  |
| 16   | flgG      | 100            | 100            | NP_281870     | Flagellar basal-body rod protein                                                |
| 17   | flgF      | 100            | 99.63          | NP_281869     | Length control of polar flagella (negatively regulating FlaA filament assembly) |
| 18   | flgH      | 100            | 99.71          | NP_281859     | Flagellar L-ring protein                                                        |
| 19   | pseE/maf5 | 100            | 97.08          | NP_282483     | Flagellin glycosylation/motility accessory factor                               |
| 20   | fliN      | 100            | 99.35          | NP_281542     | Flagellar motor switch protein,C-ring                                           |
| 21   | fliG      | 100            | 99.32          | NP_281510     | C-ring                                                                          |
| 22   | motA      | 100            | 98.71          | NP_281528     | flagellar rotation                                                              |
| 23   | motB      | 100            | 99.73          | NP_281527     | flagellar rotation                                                              |
| 24   | flhB      | 100            | 99.91          | NP_281526     | flagellar export apparatus (secretion)                                          |
| 25   | fliH      | 100            | 99.76          | NP_281511     | flagellar export apparatus (secretion)                                          |
| 26   | fliF      | 100            | 99.05          | NP_281509     | Rotor                                                                           |
| 27   | cheV      | 100            | 99.79          | YP_002343726  | Chemotaxis protein                                                              |
| 28   | cheA      | 100            | 99.26          | YP_002343725  | Chemotaxis protein                                                              |
| 29   | cheW      | 100            | 100            | YP_002343724  | Chemotaxis protein                                                              |

|    |       |       |       |              |                                                                |
|----|-------|-------|-------|--------------|----------------------------------------------------------------|
| 30 | cheY  | 100   | 99.75 | YP_002344511 | chemotaxis protein                                             |
| 31 | pseB  | 100   | 97.11 | NP_282439    | Pse biosynthetic pathway                                       |
| 32 | pseC  | 100   | 95.4  | NP_282440    | Pse biosynthetic pathway                                       |
| 33 | pseF  | 100   | 95.42 | NP_282457    | Pse biosynthetic pathway                                       |
| 34 | pseG  | 100   | 98.91 | NP_282458    | Pse biosynthetic pathway                                       |
| 35 | pseH  | 100   | 94.09 | NP_282459    | Pse biosynthetic pathway                                       |
| 36 | pseA  | 100   | 99.3  | NP_282462    | Pse biosynthetic pathway                                       |
| 37 | pseI  | 99.32 | 95.61 | NP_282463    | Pse biosynthetic pathway                                       |
| 38 | ptmB  | 100   | 99.86 | NP_282477    | flagellin proteins post translational modification             |
| 39 | ptmA  | 99.74 | 97.79 | NP_282478    | flagellin proteins post translational modification             |
| 40 | pflA  | 100   | 99.79 | NP_282693    | component of medial disk                                       |
| 41 | fliQ  | 100   | 98.52 | NP_282802    | flagellar export apparatus                                     |
| 42 | flgK  | 100   | 99.18 | NP_282606    | Flagellar hook-associated protein                              |
| 43 | fliD  | 99.07 | 97.2  | NP_281732    | Flagellar hook-associated protein 2                            |
| 44 | flgM  | 100   | 98.99 | YP_002344846 | Anti- $\sigma$ -factor                                         |
| 45 | flgJ  | 100   | 99.12 | YP_002344845 | Rod assembly protein                                           |
| 46 | flgI  | 100   | 99.05 | NP_282602    | Flagellar P-ring protein                                       |
| 47 | kpsM  | 100   | 90.93 | NP_282588    | Capsule polysaccharide ABC transporter permease                |
| 48 | kpsT  | 100   | 93.97 | NP_282587    | Capsule polysaccharide ABC transporter ATP-binding protein     |
| 49 | kpsE  | 100   | 97.41 | NP_282586    | Capsule polysaccharide ABC transporter permease                |
| 50 | kpsD  | 100   | 98.73 | NP_282585    | Capsule polysaccharide export system periplasmic protein       |
| 51 | kpsF  | 99.58 | 94.07 | NP_282584    | CPS biosynthesis                                               |
| 52 | hddA  | 100   | 94.51 | NP_282566    | putative D-glycero-D-manno-heptose 7-phosphate kinase          |
| 53 | gmhA2 | 100   | 94.55 | NP_282565    | phosphoheptose isomerase                                       |
| 54 | gmhA  | 100   | 94.12 | NP_282296    | Phosphoheptose isomerase                                       |
| 55 | gmhB  | 100   | 95.73 | NP_282299    | D-glycero-alpha-D-manno-heptose-1,7-bisphosphate 7-phosphatase |
| 56 | kpsC  | 95.31 | 95.09 | NP_282555    | Capsule polysaccharide modification protein                    |
| 57 | kpsS  | 100   | 98.56 | NP_282554    | CPS biosynthesis                                               |
| 58 | fliL  | 100   | 97.95 | NP_282549    | Motor                                                          |
| 59 | flgQ  | 100   | 99.33 | YP_002344420 | Flagellar-associated protein FlgQ                              |
| 60 | flgP  | 100   | 98.26 | YP_002344421 | Flagellar biosynthetic protein FliP                            |
| 61 | fliW  | 100   | 100   | YP_002344468 | flagellar assembly protein                                     |

|    |        |       |       |                  |                                                                                                                                         |
|----|--------|-------|-------|------------------|-----------------------------------------------------------------------------------------------------------------------------------------|
| 62 | waaC   | 100   | 98.25 | NP 282281        | Heptosyltransferase I                                                                                                                   |
| 63 | htrB   | 100   | 97.52 | NP 282282        | acyltransferase                                                                                                                         |
| 64 | Cj1135 | 98.97 | 95.04 | NP 282283        | glucosyltransferase                                                                                                                     |
| 65 | waaV   | 95.27 | 91.73 | NP 282294        | Lipooligosaccharide biosynthesis<br>glycosyltransferase                                                                                 |
| 66 | waaF   | 99.79 | 93.42 | NP 282295        | ADP-heptose--LPS heptosyltransferase II                                                                                                 |
| 67 | hldE   | 100   | 93.72 | NP 282297        | phosphorylation of D-glycero-D-manno-<br>heptose 7-phosphate; ADP transfer from<br>ATP to D-glycero-beta-D-manno-heptose<br>1-phosphate |
| 68 | hldD   | 100   | 97.69 | NP 282298        | ADP-glyceromanno-heptose 6-epimerase                                                                                                    |
| 69 | fliI   | 100   | 98.41 | NP 281405        | H(+)-transporting two-sector ATPase                                                                                                     |
| 70 | eptC   | 100   | 97.92 | YP_0023436<br>98 | Lipid A/FlgG phosphoethanolamine<br>transferase                                                                                         |
| 71 | rpoN   | 100   | 99.04 | YP_0023440<br>93 | RNA polymerase sigma-54 factor                                                                                                          |
| 72 | fliS   | 100   | 100   | NP 281733        | Flagellar secretion chaperone                                                                                                           |
| 73 | flaG   | 100   | 99.45 | NP 281731        | Flagellar protein                                                                                                                       |
| 74 | flgB   | 100   | 97.69 | NP 281712        | Flagellar basal body rod protein                                                                                                        |
| 75 | flgC   | 100   | 99.39 | NP 281711        | Flagellar basal-body rod protein                                                                                                        |
| 76 | fliE   | 100   | 99.33 | NP 281710        | Flagellar hook-basal body complex protein                                                                                               |
| 77 | fliK   | 99.83 | 99.67 | NP 281263        | Putative flagellar hook-length control<br>protein                                                                                       |
| 78 | flgD   | 100   | 99.44 | NP 281264        | Basal-body rod modification protein                                                                                                     |
| 79 | flgE   | 100   | 100   | NP 281265        | flagellar hook protein                                                                                                                  |
| 80 | fliY   | 100   | 99.88 | NP 281274        | Flagellar motor switch protein                                                                                                          |
| 81 | fliM   | 100   | 98.43 | NP 281275        | Flagellar motor switch protein                                                                                                          |
| 82 | fliA   | 100   | 99.86 | NP 281276        | RNA polymerase sigma factor for flagellar<br>operon                                                                                     |
| 83 | flhG   | 100   | 99.77 | NP 281278        | Polar flagellar biogenesis                                                                                                              |
| 84 | flhF   | 100   | 99.66 | NP 281279        | Flagellar biosynthesis protein                                                                                                          |
| 85 | cdtC   | 100   | 100   | NP 281290        | toxin activity                                                                                                                          |
| 86 | cdtB   | 100   | 99.5  | NP 281291        | toxin activity                                                                                                                          |
| 87 | cdtA   | 100   | 99.5  | NP 281292        | toxin activity                                                                                                                          |

## B. Virulence genes of *C. coli* strain

| No . | GENE  | %COVERA<br>GE | %<br>IDENTIT<br>Y | ACCESSI<br>ON    | ROLE                                                       |
|------|-------|---------------|-------------------|------------------|------------------------------------------------------------|
| 1    | flaD  | 100           | 93.25             | NP_282040        | Flagella biosynthesis                                      |
| 2    | flgC  | 100           | 91.11             | NP_281711        | Flagellar basal-body rod protein                           |
| 3    | flgB  | 100           | 90.97             | NP_281712        | Flagellar basal body rod protein                           |
| 4    | flaG  | 100           | 99.73             | NP_281731        | Flagellar protein                                          |
| 5    | fliD  | 100           | 96.38             | NP_281732        | Flagellar hook-associated protein 2                        |
| 6    | fliS  | 100           | 91.47             | NP_281733        | Flagellar secretion chaperone                              |
| 7    | cheW  | 100           | 100               | YP_0023437<br>24 | Chemotaxis protein                                         |
| 8    | cheA  | 100           | 93.77             | YP_0023437<br>25 | Chemotaxis protein                                         |
| 9    | cheV  | 100           | 92.37             | YP_0023437<br>26 | Chemotaxis protein                                         |
| 10   | fliN  | 100           | 95.15             | NP_281542        | Flagellar motor switch protein,C-ring                      |
| 11   | hddC  | 96.25         | 92.51             | NP_282564        | D-glycero-D-manno-heptose 1-phosphate guanosyltransferase  |
| 12   | gmhA2 | 100           | 93.23             | NP_282565        | phosphoheptose isomerase                                   |
| 13   | hddA  | 100           | 94.61             | NP_282566        | putative D-glycero-D-manno-heptose 7-phosphate kinase      |
| 14   | kpsF  | 98.95         | 94.88             | NP_282584        | CPS biosynthesis                                           |
| 15   | kpsD  | 100           | 99.28             | NP_282585        | Capsule polysaccharide export system periplasmic protein   |
| 16   | kpsE  | 100           | 97.05             | NP_282586        | Capsule polysaccharide ABC transporter permease            |
| 17   | kpsT  | 100           | 93.97             | NP_282587        | Capsule polysaccharide ABC transporter ATP-binding protein |
| 18   | flgJ  | 100           | 96.2              | YP_0023448<br>45 | Rod assembly protein                                       |
| 19   | flgM  | 100           | 98.99             | YP_0023448<br>46 | Anti- $\sigma$ -factor                                     |
| 20   | flgK  | 100           | 94.31             | NP_282606        | Flagellar hook-associated protein                          |
| 21   | fliM  | 99.72         | 91.94             | NP_281275        | Flagellar motor switch protein                             |
| 22   | fliY  | 100           | 98.81             | NP_281274        | Flagellar motor switch protein                             |
| 23   | flgE  | 100           | 97.01             | NP_281265        | flagellar hook protein                                     |
| 24   | flgD  | 99.32         | 98.98             | NP_281264        | Basal-body rod modification protein                        |
| 25   | fliK  | 49.36         | 98.2              | NP_281263        | Putative flagellar hook-length control protein             |
| 26   | fliK  | 53.87         | 96.62             | NP_281263        | Putative flagellar hook-length control protein             |
| 27   | pseB  | 100           | 94.43             | NP_282439        | Pse biosynthetic pathway                                   |
| 28   | pseC  | 100           | 94.61             | NP_282440        | Pse biosynthetic pathway                                   |
| 29   | pseF  | 100           | 95.71             | NP_282457        | Pse biosynthetic pathway                                   |
| 30   | pseG  | 100           | 98.91             | NP_282458        | Pse biosynthetic pathway                                   |

|    |           |       |       |              |                                                                                                                               |
|----|-----------|-------|-------|--------------|-------------------------------------------------------------------------------------------------------------------------------|
| 31 | pseH      | 100   | 93.88 | NP_282459    | Pse biosynthetic pathway                                                                                                      |
| 32 | pseA      | 100   | 98.94 | NP_282462    | Pse biosynthetic pathway                                                                                                      |
| 33 | pseI      | 100   | 97.77 | NP_282463    | Pse biosynthetic pathway                                                                                                      |
| 34 | maf4      | 99.33 | 90.14 | YP_002344724 | Flagellin glycosylation                                                                                                       |
| 35 | Cj1420c   | 100   | 99.87 | NP_282561    | capsule polysaccharide biosynthesis                                                                                           |
| 36 | Cj1419c   | 100   | 99.61 | NP_282560    | capsule polysaccharide biosynthesis                                                                                           |
| 37 | Cj1417c   | 100   | 98.67 | NP_282558    | capsule polysaccharide biosynthesis                                                                                           |
| 38 | Cj1416c   | 99.87 | 98.95 | NP_282557    | capsule polysaccharide biosynthesis                                                                                           |
| 39 | cysC      | 100   | 99.03 | NP_282556    | capsule polysaccharide biosynthesis                                                                                           |
| 40 | kpsC      | 99.95 | 95.32 | NP_282555    | Capsule polysaccharide modification protein                                                                                   |
| 41 | kpsS      | 100   | 98.65 | NP_282554    | CPS biosynthesis                                                                                                              |
| 42 | fliL      | 100   | 99.63 | NP_282549    | Motor                                                                                                                         |
| 43 | flaA      | 100   | 93.56 | NP_282485    | Flagellin gene                                                                                                                |
| 44 | flaB      | 100   | 94.49 | NP_282484    | Flagellin gene                                                                                                                |
| 45 | pseE/maf5 | 100   | 97.51 | NP_282483    | Flagellin glycosylation/motility accessory factor                                                                             |
| 46 | ptmA      | 100   | 95.33 | NP_282478    | flagellin proteins post translational modification                                                                            |
| 47 | ptmB      | 100   | 95.62 | NP_282477    | flagellin proteins post translational modification                                                                            |
| 48 | waaV      | 96.85 | 93.37 | NP_282294    | Glycosyltransferase                                                                                                           |
| 49 | waaF      | 98.02 | 94.93 | NP_282295    | ADP-heptose--LPS heptosyltransferase II                                                                                       |
| 50 | gmhA      | 100   | 95.19 | NP_282296    | Phosphoheptose isomerase                                                                                                      |
| 51 | hldE      | 100   | 93.43 | NP_282297    | phosphorylation of D-glycero-D-manno-heptose 7-phosphate; ADP transfer from ATP to D-glycero-beta-D-manno-heptose 1-phosphate |
| 52 | hldD      | 100   | 98.01 | NP_282298    | ADP-glyceromanno-heptose 6-epimerase                                                                                          |
| 53 | flgH      | 100   | 98.71 | NP_281859    | Flagellar L-ring protein                                                                                                      |
